# Supplementary material
Source: Springer Nature journal article supplement (https://www.springermedizin.de/resource/supplementary/40478_2013_59_MOESM15_ESM.pdf/25658004)

**a**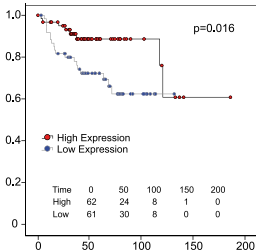**b**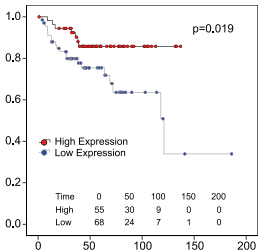

Supplement: MOESM15 [file 25658004]
